# Supplementary material
Source: PubMed Central journal article supplement (PMC9380699)

**Fig S1**

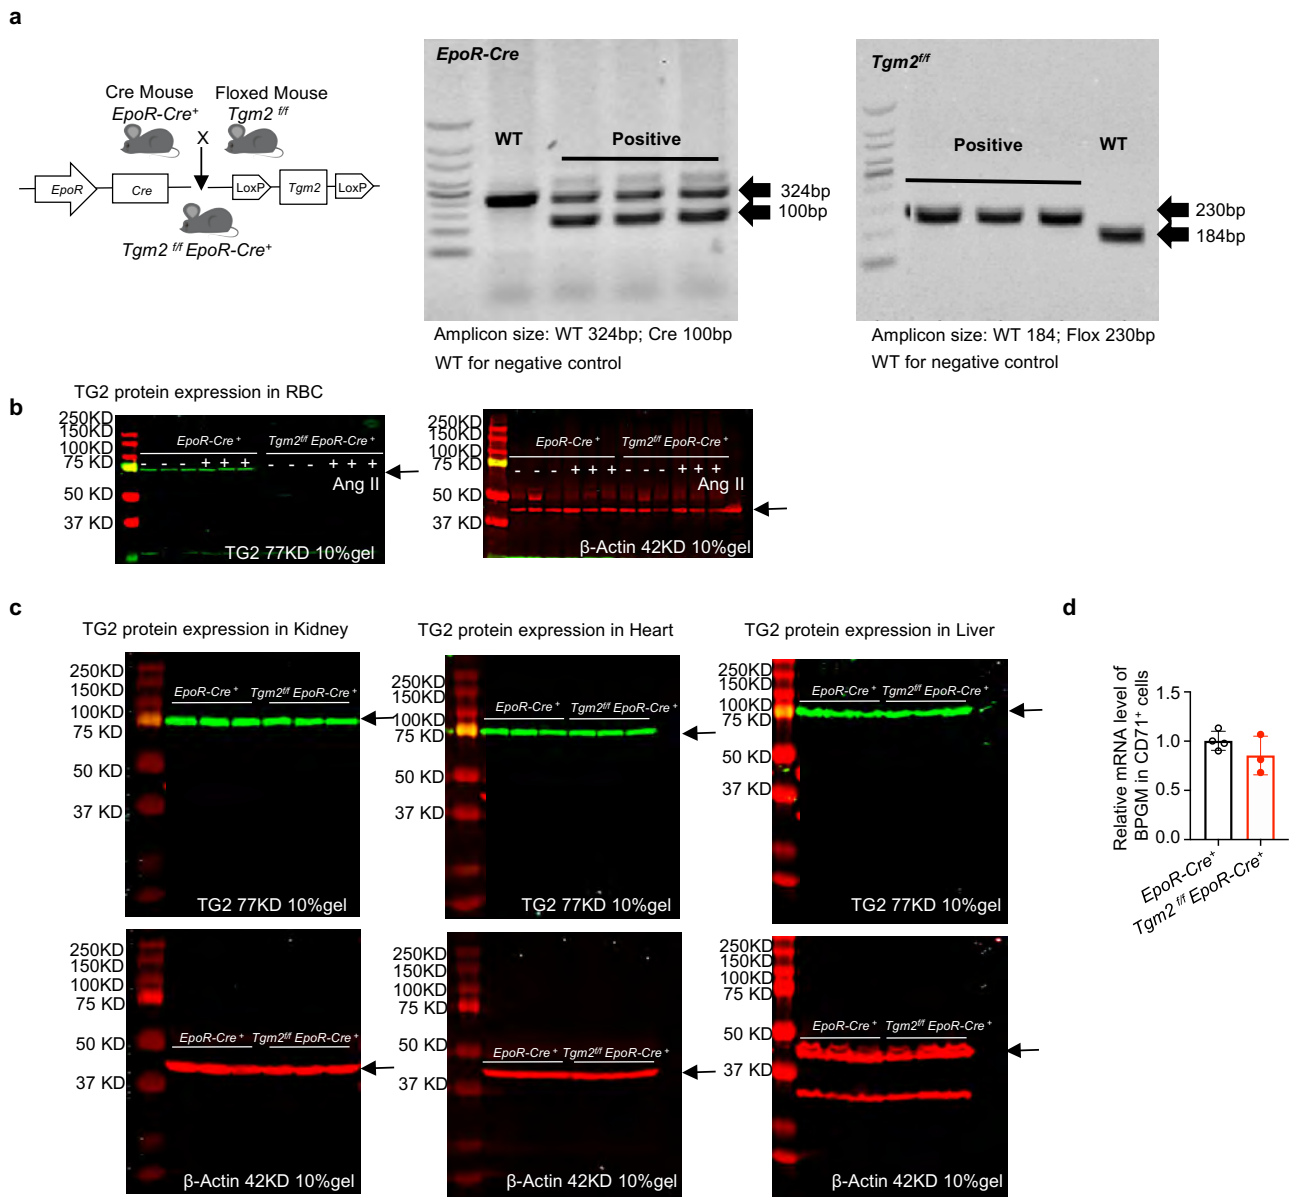

**Figure S1. Generation of mice with deletion of *Tgm2* in erythroid cells, related to Figure 1 and STAR Methods.**

**a.** Schematic representation of erythrocyte specific *Tgm2* deletion mice (*Tgm2<sup>fl/fl</sup>EpoR-Cre<sup>+</sup>*) generation (left panel); Representative genotyping results of experimental mice (right panel).

**b.** TG2 protein levels in *EpoR-Cre<sup>+</sup>* and *Tgm2<sup>fl/fl</sup>EpoR-Cre<sup>+</sup>* mouse RBC.

**c.** TG2 protein levels in kidney, heart and liver of *EpoR-Cre<sup>+</sup>* and *Tgm2<sup>fl/fl</sup>EpoR-Cre<sup>+</sup>* mouse.

**d.** Relative mRNA levels in CD71<sup>+</sup> cells. Data are expressed as mean ± SD. Data were analyzed by unpaired t-test, (n=3 or 4).

Fig S2

a

Table 1. Potential TG2 substrates

|    | Identified Proteins (23)                                | Alternate ID |
|----|---------------------------------------------------------|--------------|
| 1  | Phosphatidylinositol phosphatase SAC1                   | Sacm1l       |
| 2  | Actin-related protein 2/3 complex subunit 2             | Arpc2        |
| 3  | Ras GTPase-activating protein 3                         | Rasa3        |
| 4  | Tubulin beta-5 chain                                    | Tubb5        |
| 5  | Flavin reductase (NADPH)                                | Blvrb        |
| 6  | Aldehyde dehydrogenase family 16 member A1              | Aldh16a1     |
| 7  | Heat shock protein HSP 90-beta                          | Hsp90ab1     |
| 8  | Ketosamine-3-kinase                                     | Fn3krp       |
| 9  | COP9 signalosome complex subunit 4                      | Cops4        |
| 10 | Gamma-adducin                                           | Add3         |
| 11 | Beta-parvin                                             | Parvb        |
| 12 | Flotillin-2                                             | Flot2        |
| 13 | Casein kinase II subunit alpha                          | Csnk2a1      |
| 14 | Phospholipid transfer protein C2CD2L                    | C2cd2l       |
| 15 | Integrin-linked protein kinase                          | Ilk          |
| 16 | DnaJ homolog subfamily B member 4                       | Dnajb4       |
| 17 | ATP-binding cassette sub-family F member 1              | Abcf1        |
| 18 | Prohibitin-2                                            | Phb2         |
| 19 | Bisphosphoglycerate mutase                              | Bpgm         |
| 20 | Guanine nucleotide-binding protein G(i) subunit alpha-2 | Gnai2        |
| 21 | Integrin alpha-IIb                                      | Itga2b       |
| 22 | Transferrin receptor protein 1                          | Tfrc         |
| 23 | ATP-binding cassette sub-family B member 6              | Abcb6        |

b

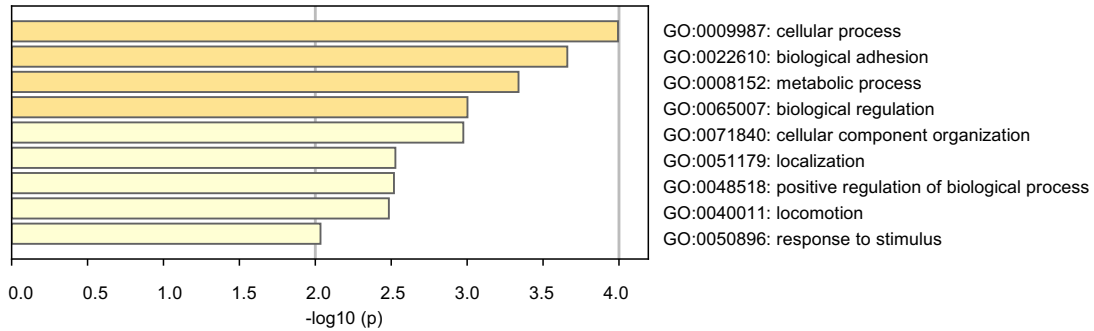

c

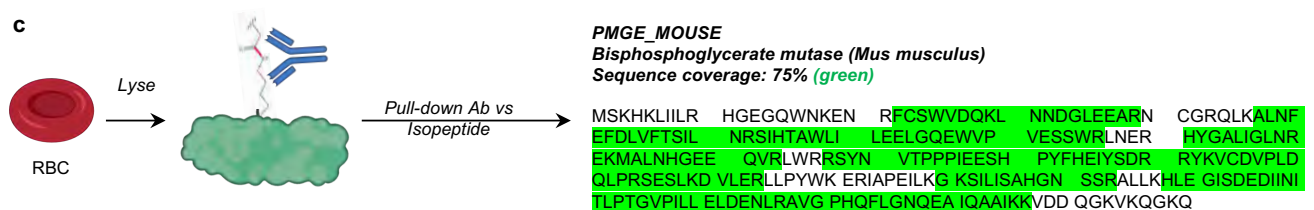

Figure S2. BPGM and 22 additional potential proteins were identified as TG2 substrates, related to Figure 1.

a. Potential targets modified by eTG2 based on isopeptide pulldown of membrane proteins.

b. The Gene Ontology biological processes of genes from isopeptide pulldown proteins between *EpoR-Cre*<sup>+</sup> and *Tgm2*<sup>fl/fl</sup>*EpoR-Cre*<sup>+</sup> mice analyzed by Metascape.

c. Proteomics analysis of BPGM.

Fig S3

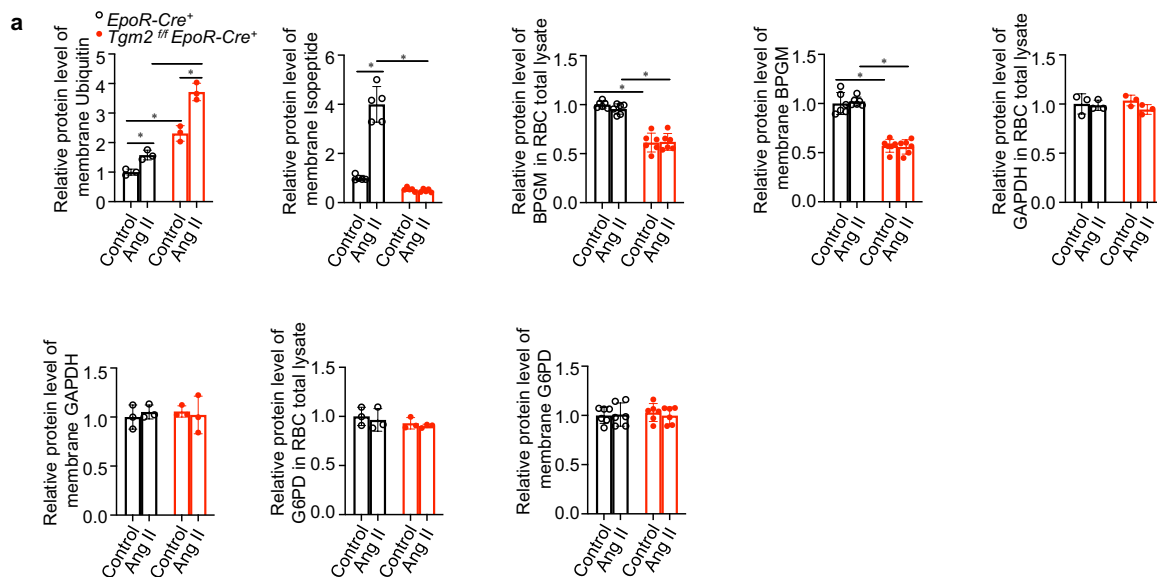

**Figure S3. Effect of Ang II-mediated pathological hypoxia on the protein levels of BPGM, GAPDH, G6PD, ubiquitin and isopeptide, related to Figure 3.**

a. Protein levels of ubiquitin, isopeptide, BPGM, GAPDH and G6PD as quantified by densitometry. Data are expressed as mean  $\pm$  SD, \**P* < 0.05, (n=3-6). Data in this figure were analyzed by two-way ANOVA followed with Sidak's multiple comparisons test.

Fig S4

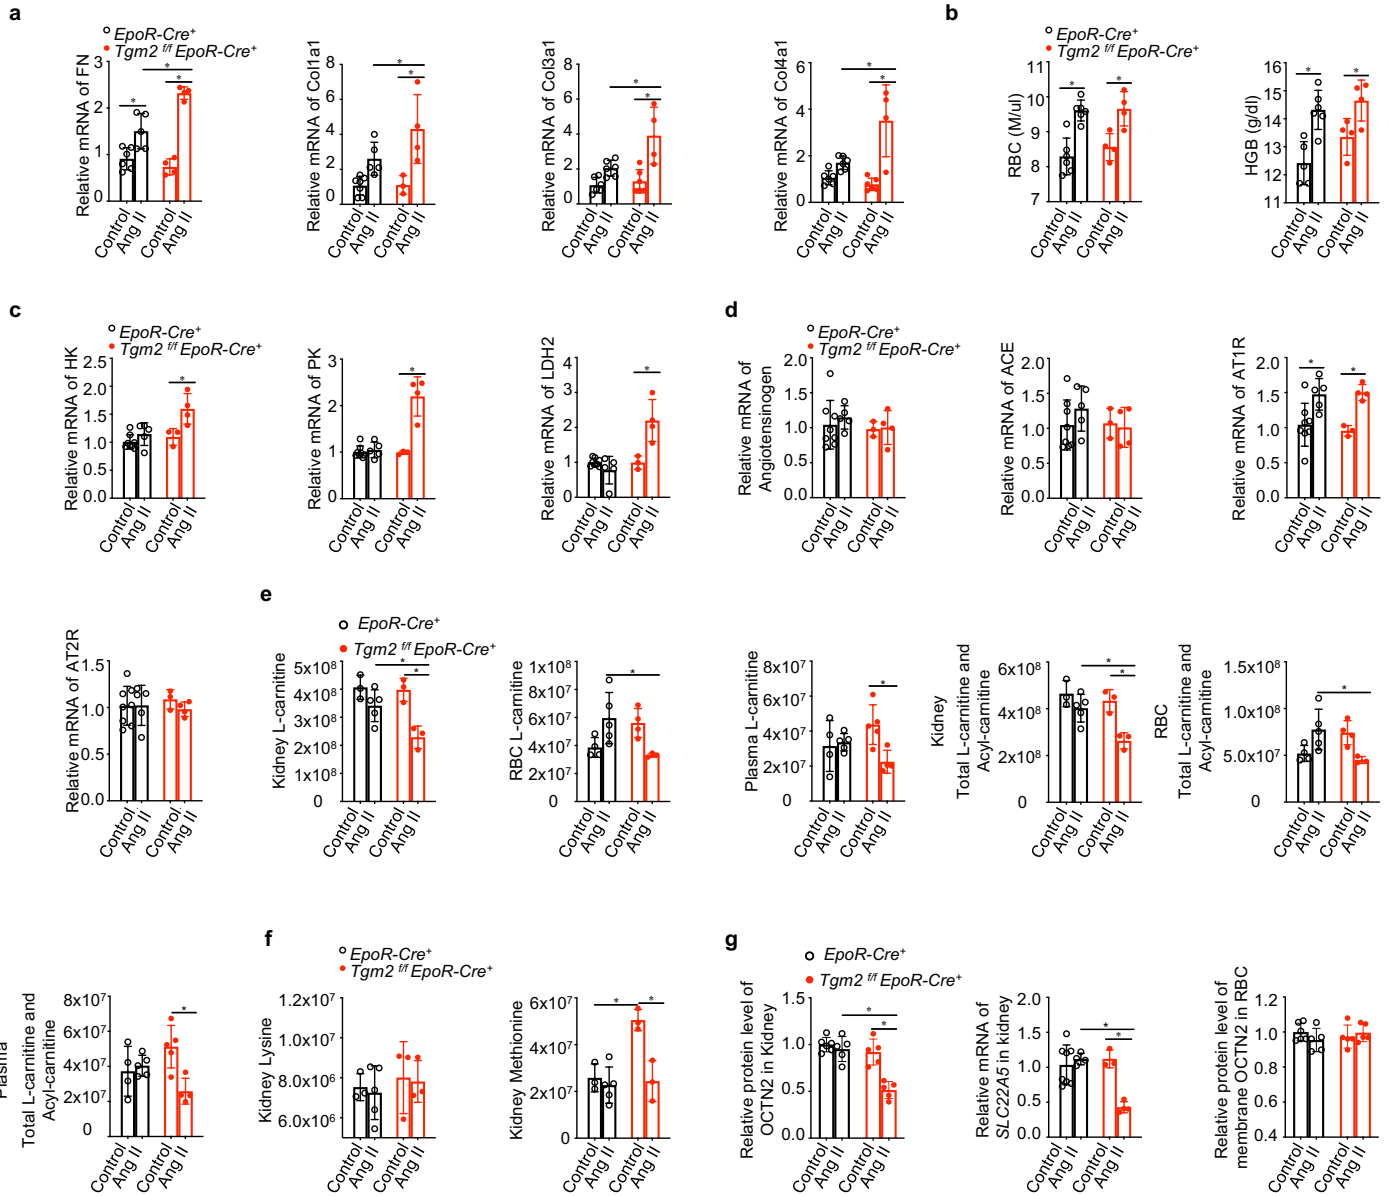

**Figure S4. Erythrocyte TG2 deletion promoted the expression of fibrotic genes and glycolytic genes, related to Figure 4.**

**a.** Relative levels of mRNAs in kidneys for fibronectin (FN) and collagens (Col1a1, Col3a1 and Col4a1). \**P* < 0.05, (n=3-7).

**b.** Erythrocyte number and Hemoglobin (Hb) concentration were determined by complete blood count (CBC). \**P* < 0.05, (n=4-6).

**c.** Relative mRNA levels of hexokinase (HK), pyruvate kinase (PK) and lactate dehydrogenase 2 (LDH2) in kidney. \**P* < 0.05, (n=3-8).

**d.** qRT-PCR analyses of mRNAs encoding renin-angiotensin system (RAS) components in kidney tissues from *EpoR-Cre*<sup>+</sup> and *Tgm2*<sup>fl</sup>/*EpoR-Cre*<sup>+</sup> mice with or without Ang II treatment; angiotensinogen, angiotensin-converting enzyme (ACE), Angiotensin II type I receptor (AT1R) and Angiotensin II type 2 receptor (AT2R). \**P* < 0.05, (n=3-8).

**e.** L-carnitine and acyl-carnitine levels of kidney, RBC and plasma were quantified by metabolomic screening. \**P* < 0.05, (n=3-5).

**f.** Kidney lysine and methionine levels were quantified by metabolomic screening. \**P* < 0.05, (n=3-5).

**g.** Protein levels of OCTN2 in kidneys and erythrocyte membranes and the mRNA levels of *Slc22a5* (the gene encoding OCTN2) in kidney, were quantified, \**P* < 0.05, (n=3-7). All data are expressed as mean ± SD and were analyzed by two-way ANOVA followed with Sidak's multiple comparisons test.

**Fig S5**

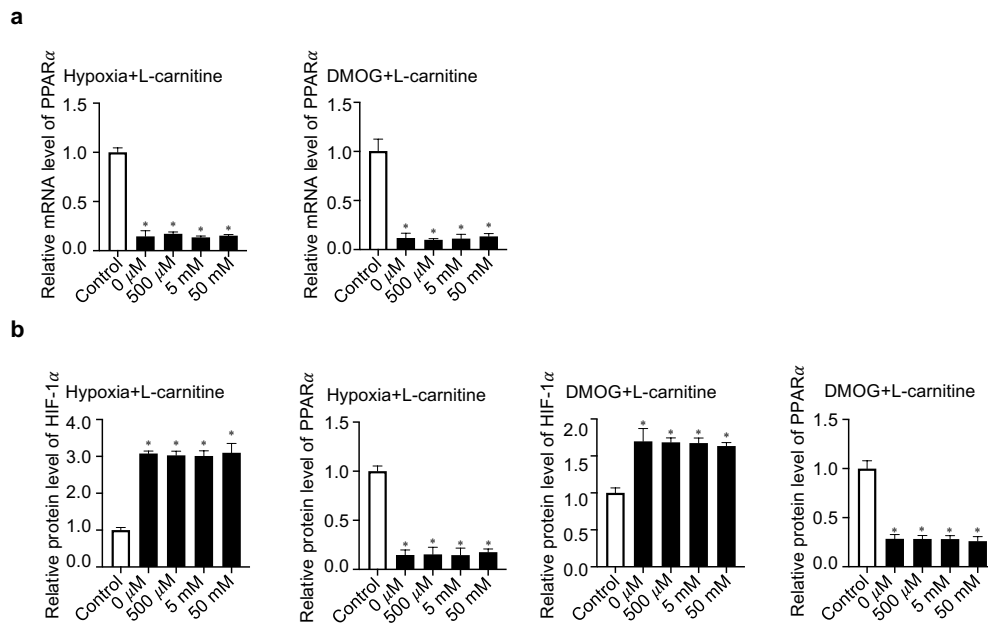

**Figure S5. L-carnitine has no effect on the protein and mRNA expression of HIF-1 $\alpha$  and PPAR $\alpha$  in primary kidney organ cultures, related to Figure 7.**

**a.** PPAR $\alpha$  mRNA levels were detected after hypoxia or DMOG treatment of primary kidney organ cultures in the presence or absence of various concentrations of L-carnitine. Data are expressed as mean  $\pm$  SD, \* $P$ <0.05 versus Control, (n=3).

**b.** Quantification of western blot data in Figure 7d. Data are expressed as mean  $\pm$  SD, \* $P$ <0.05 versus Control, (n=3). Data were analyzed by two-way ANOVA followed with Tukey's multiple comparisons test.

**Table S1. Human volunteer characteristics (Related to Figure 1)**

|                          | Male       | Female     |
|--------------------------|------------|------------|
| Age                      | 21.09±1.30 | 20.57±1.62 |
| HT (cm)                  | 181.3±4.26 | 169.2±5.77 |
| WT (kg)                  | 75.71±6.39 | 63.47±6.55 |
| BMI (kg/m <sup>2</sup> ) | 22.99±1.68 | 22.1±1.87  |
| Number                   | 11         | 7          |

Data are expressed as mean ± SEM; height (HT), weight (WT), body mass index (BMI), n=18. Related to Figure 1.

**Table S2. Sequences of RT-PCR primers. (Related to STAR Methods.)**

| Gene Name                             | Forward primers (5'-3')                          | Reverse primers (5'-3')    |
|---------------------------------------|--------------------------------------------------|----------------------------|
| Hexokinase (HK)                       | GGAGCAGTGGACCAGGGTA                              | GAAGTTCAGCTGTTTTTGAATTG    |
| Pyruvate kinase (PK)                  | AAGAAGGGAGCCACTCTGAA                             | CTTGTAGTCCAGCCACAGGAT      |
| Lactate dehydrogenase 2 (LDH2)        | GGCACGTTCAAGTTGGTCTT                             | GAAATGGACTCGTCGGTGTT       |
| mCol4a                                | GACAGCCAGGTTTGACAGGT                             | GGCAGCTCTCTCCTTTCTGA       |
| mCol3a                                | ACAGCTGGTGAACCTGGAAG                             | ACCAGGAGATCCATCTCGAC       |
| mCol1a                                | GCTCTTTTTAGATACTGTGGTGAGGAAGTTTTCCACGTCTCACCATTG |                            |
| Mouse fibronectin (mFn)               | ACAAGGTTTCGGGAAGAGGTT                            | CCGTGTAAGGGTCAAAGCAT       |
| Slc22a5                               | GGA CCA GAA ACT TAA CAA CGA CG                   | CAG GCT GTG TGA ATG GAC CT |
| angiotensinogen                       | TCTCCTTTACCACAACAAGAGCA                          | CTTCTCATTACAGGGGAGGT       |
| angiotensin-converting enzyme (ACE)   | AGGTTGGGCTACTCCAGGAC                             | GGTGAGTTGTTGTCTGGCTTC      |
| Angiotensin II type I receptor (AT1R) | ATGCTTGGGGCAACTTCACTA                            | GCAGCAAGAGAAGGGCTTCA       |
| Angiotensin II type 2 receptor (AT2R) | GAAGCTCCGCAGTGTGTTTA                             | TGGCTAGGCTGATTACATGC       |
| PPAR-α                                | TGCAAACCTGGACTTGAACG                             | GATCAGCATCCCGTCTTTGT       |

Data S1. Original Images of Representative Western blot and PCR Agarose Gel.  
Related to Figures 1-7 and S1.

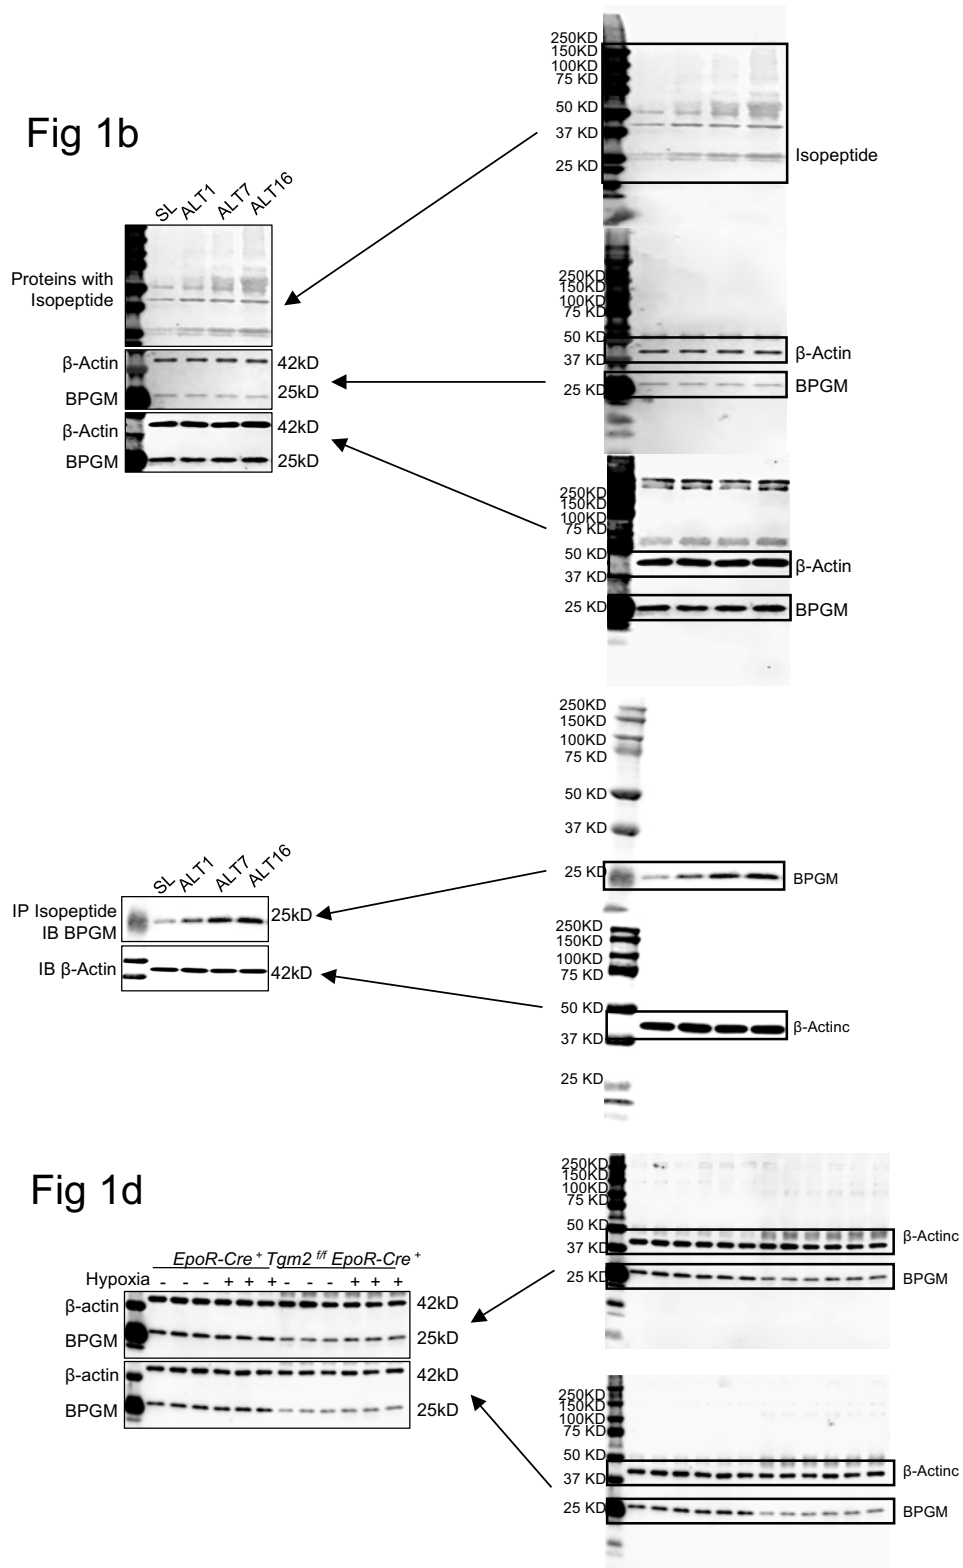

Fig 1f

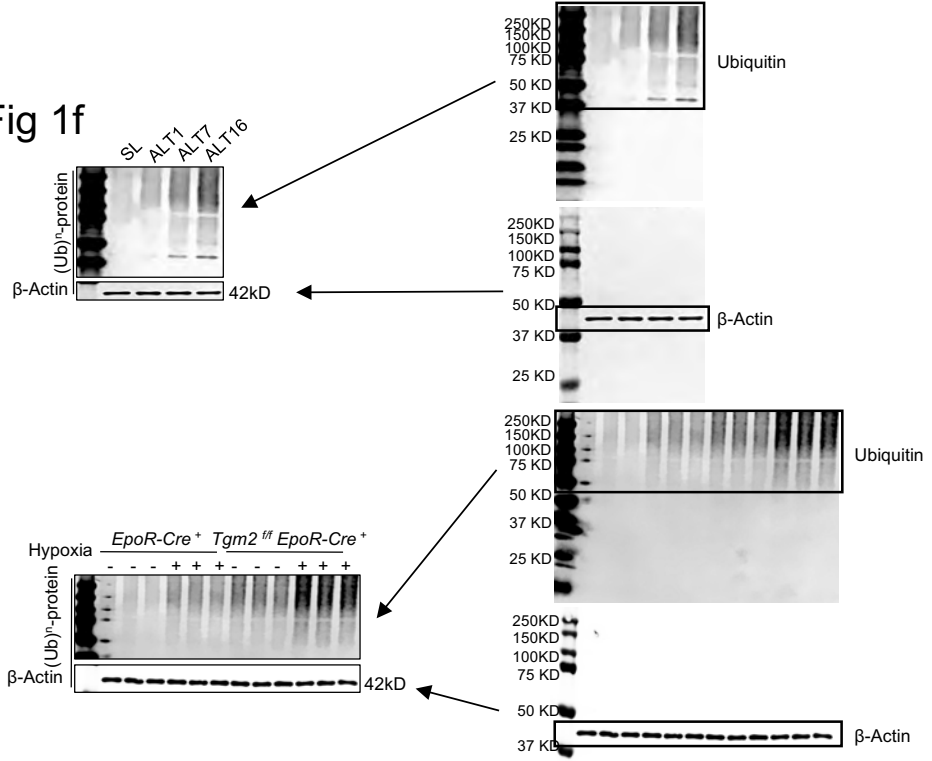

Fig 2c

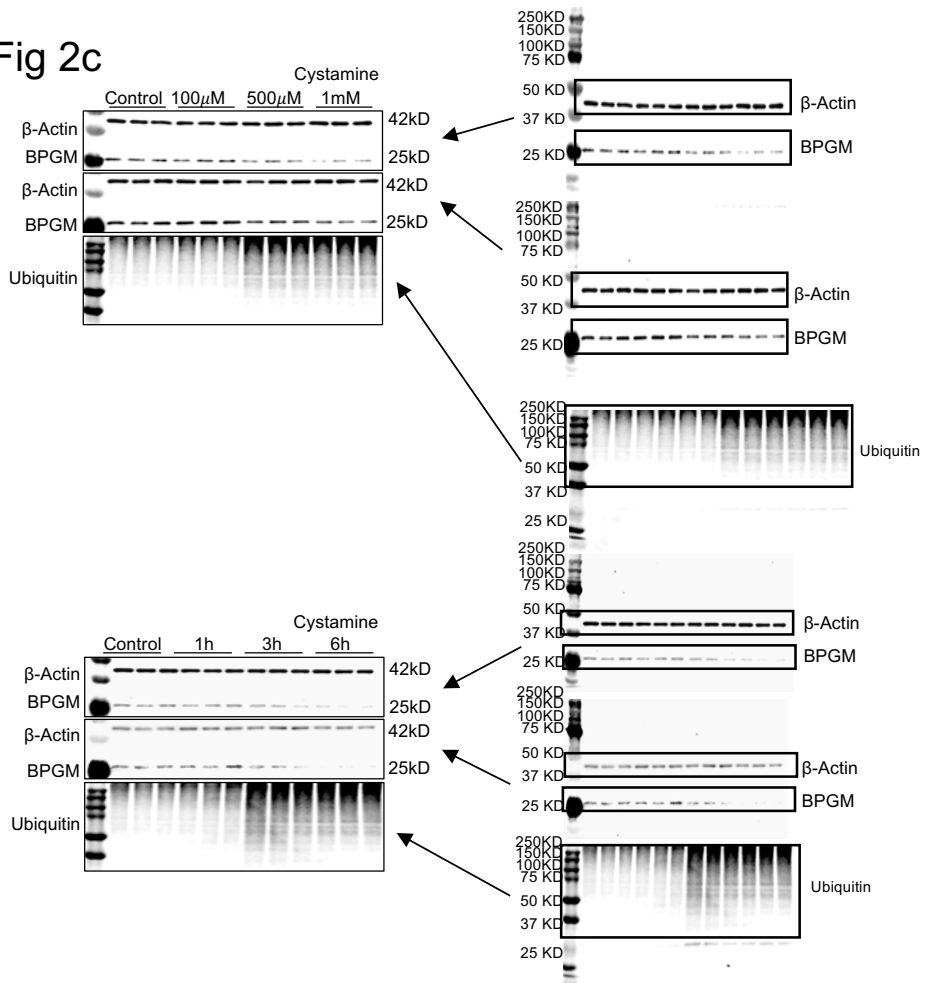



Fig 2d

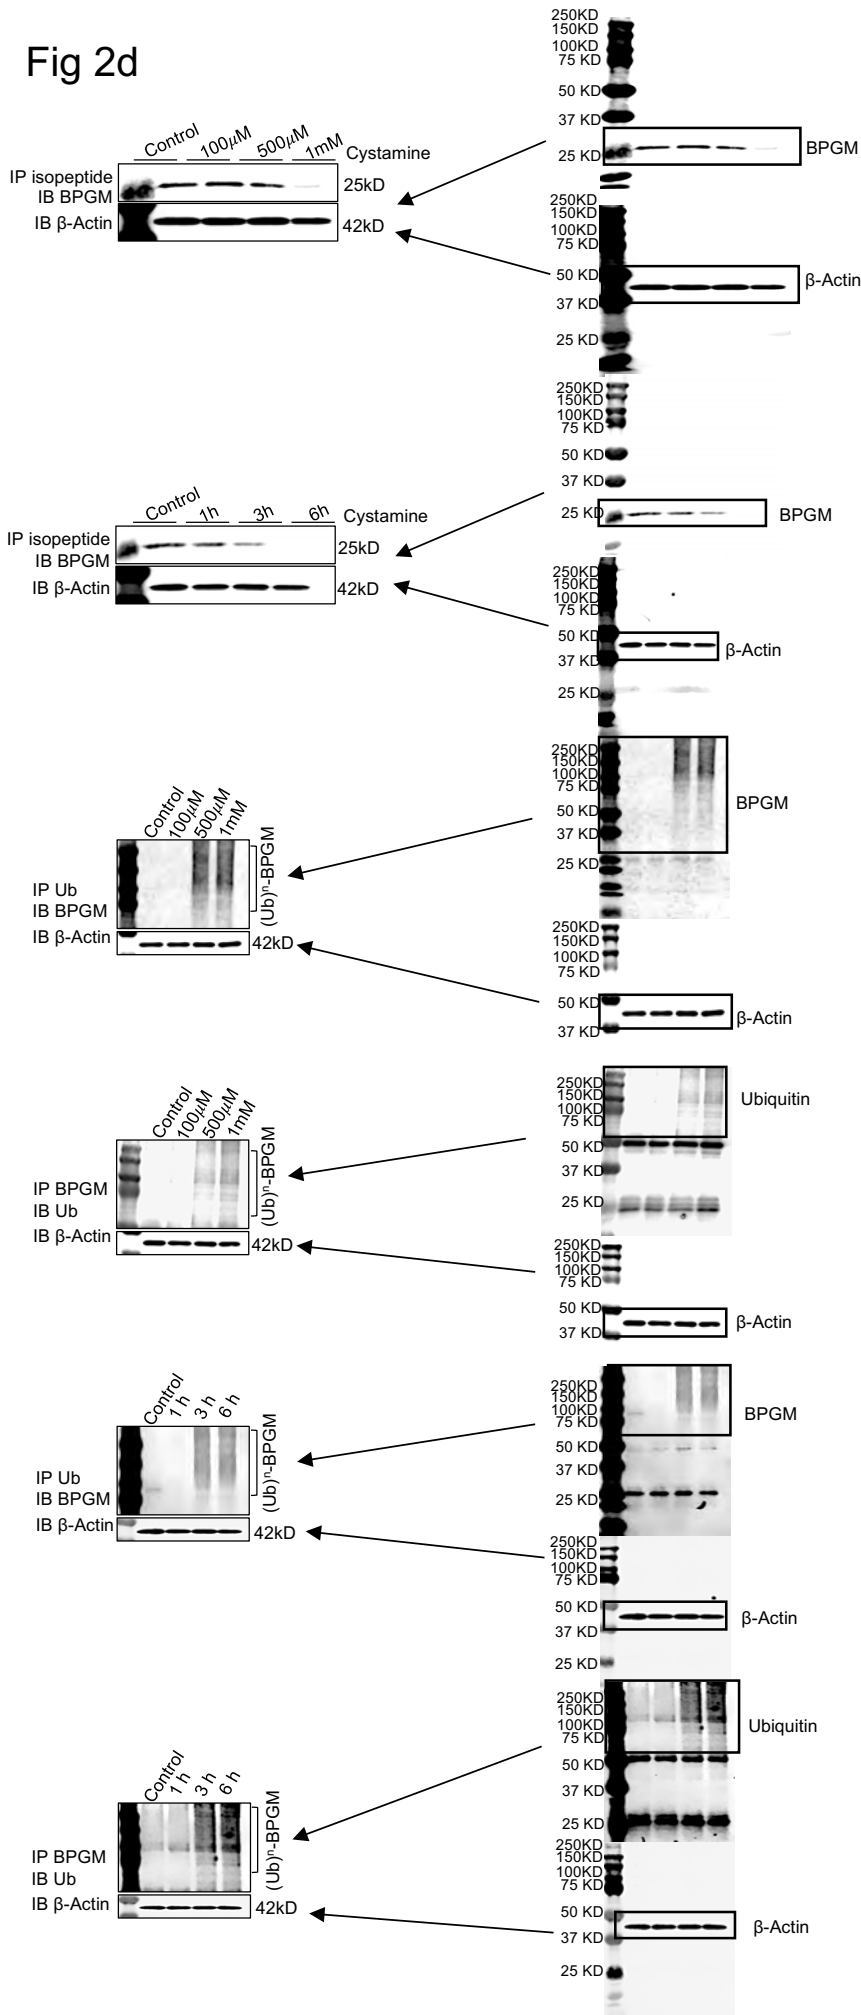

Fig 2f

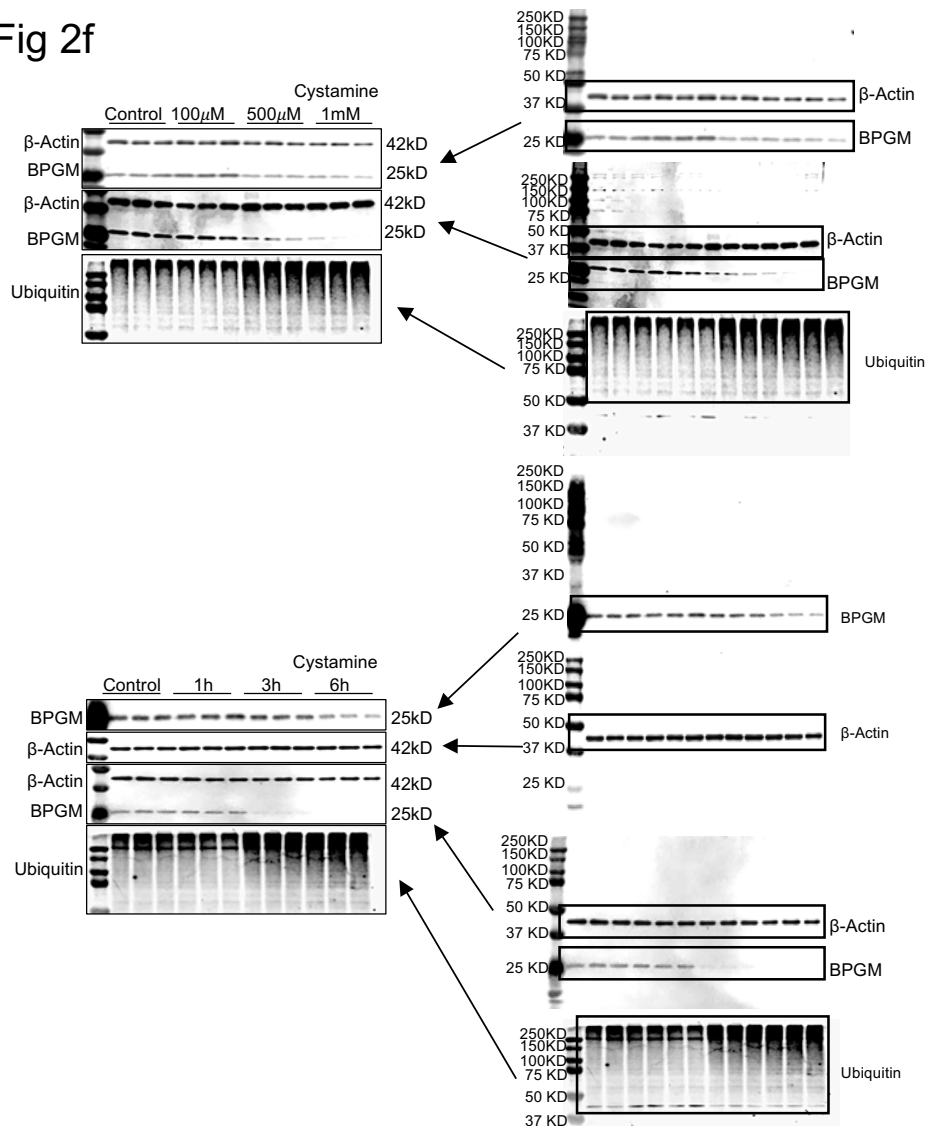

Fig 2g

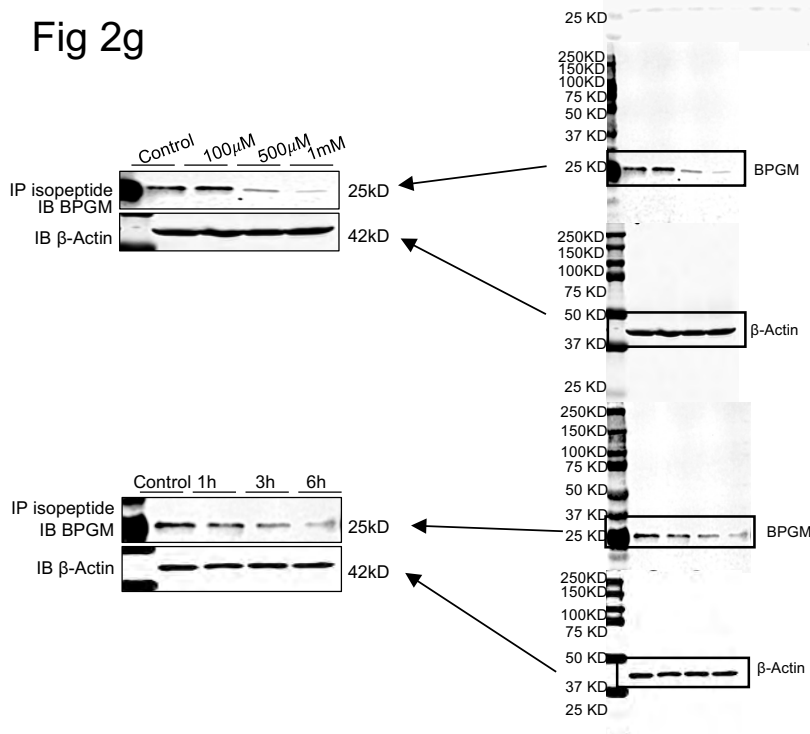

Fig 2g

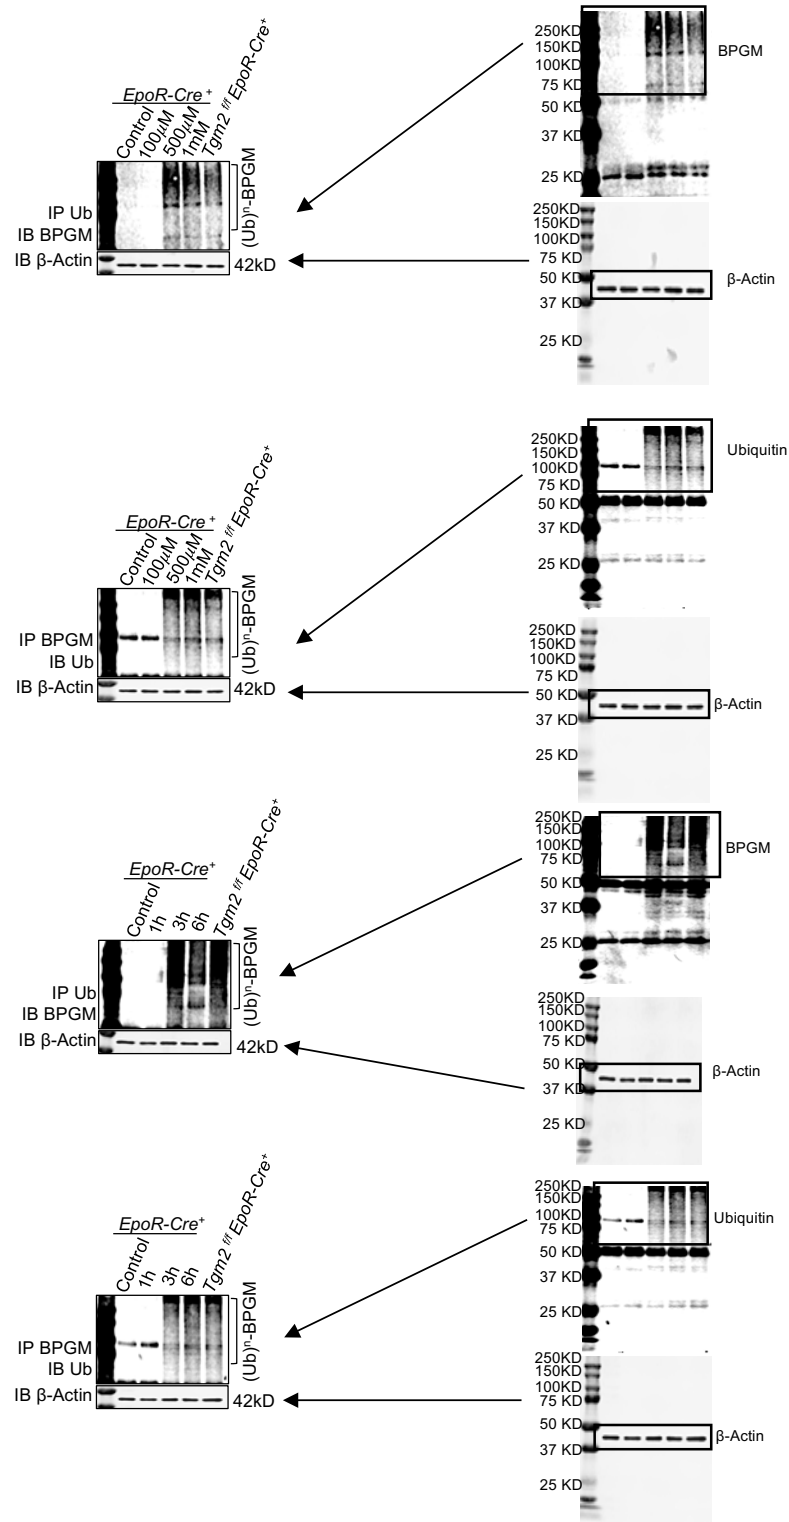

Fig 3b

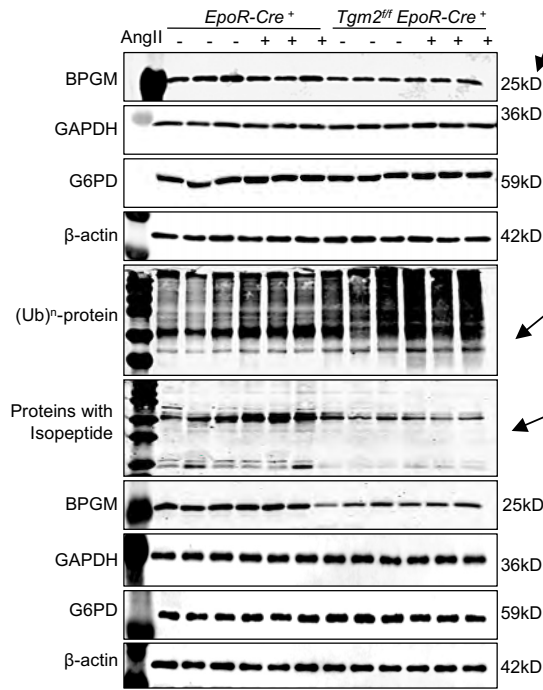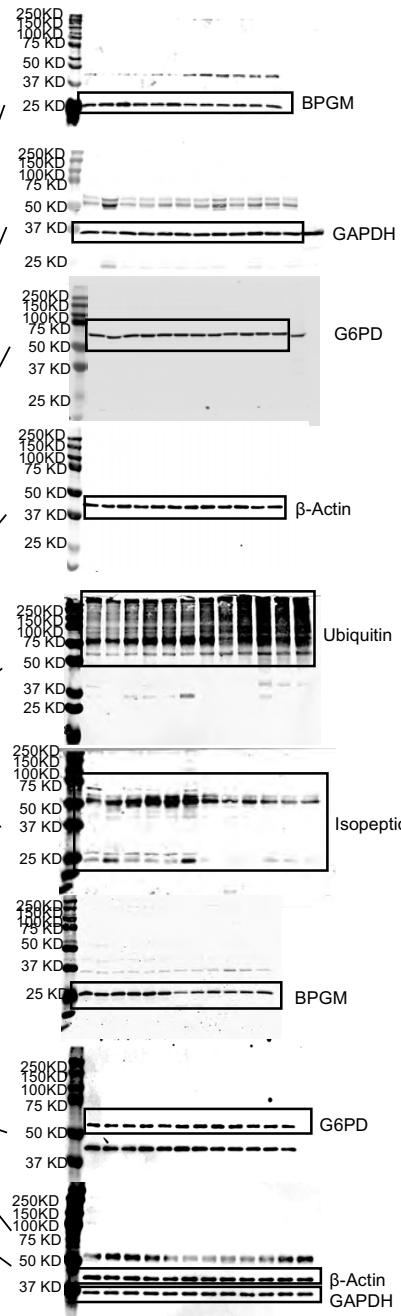

Fig 4h

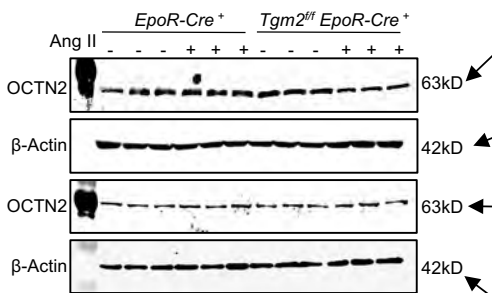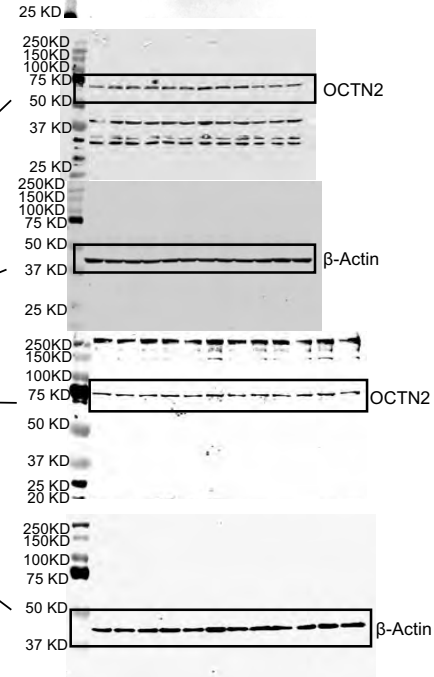

**Fig 6b**

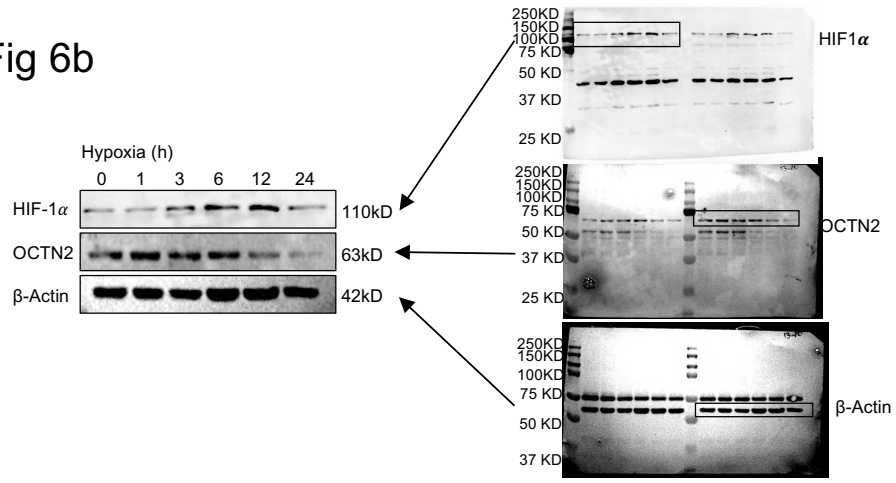

**Fig 6c**

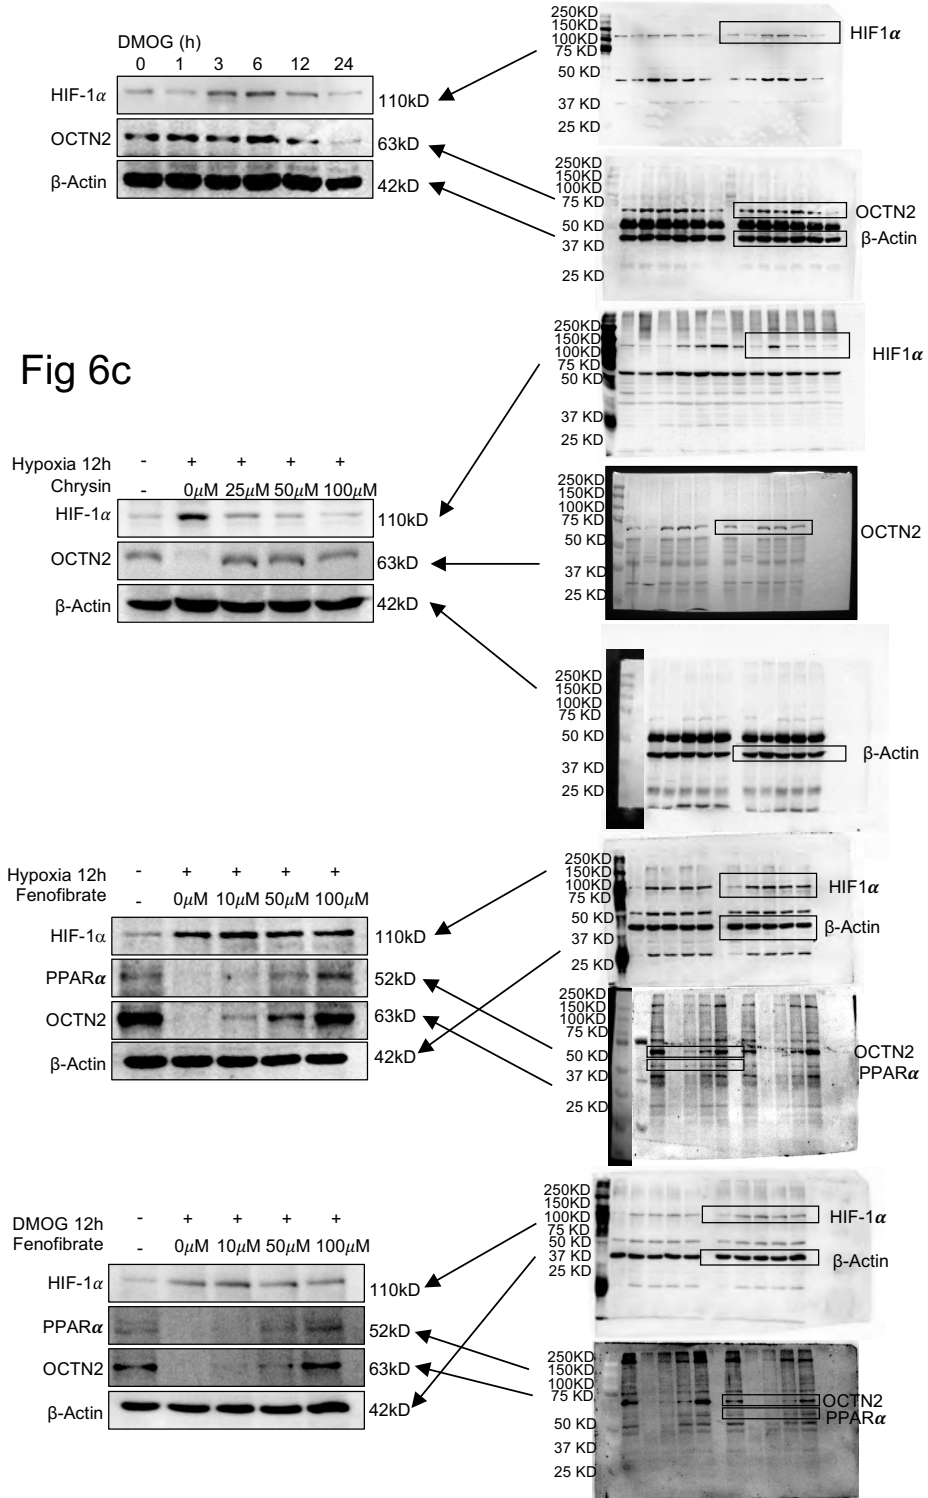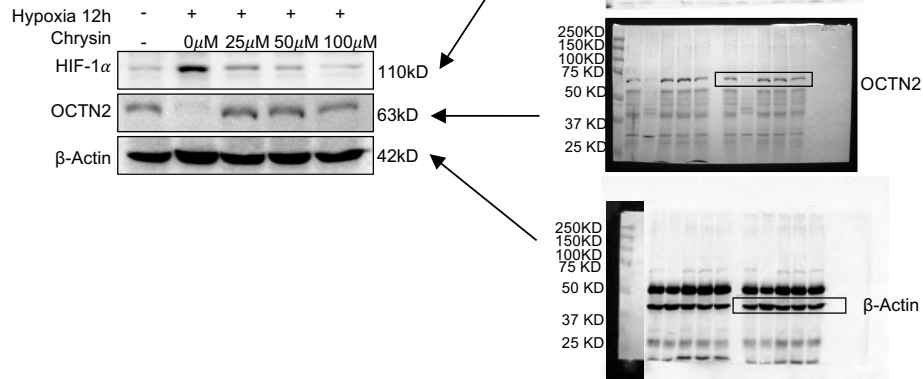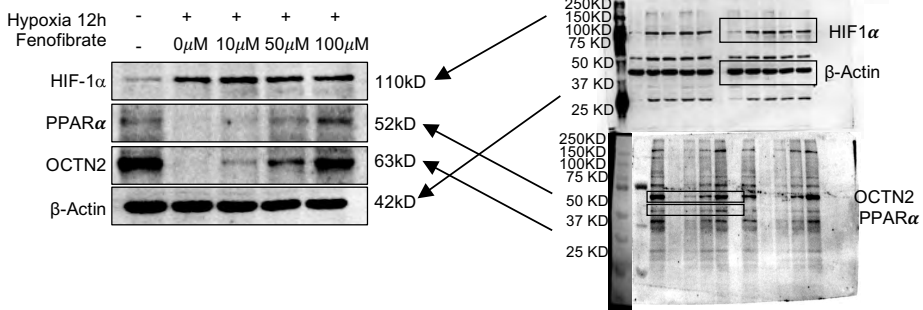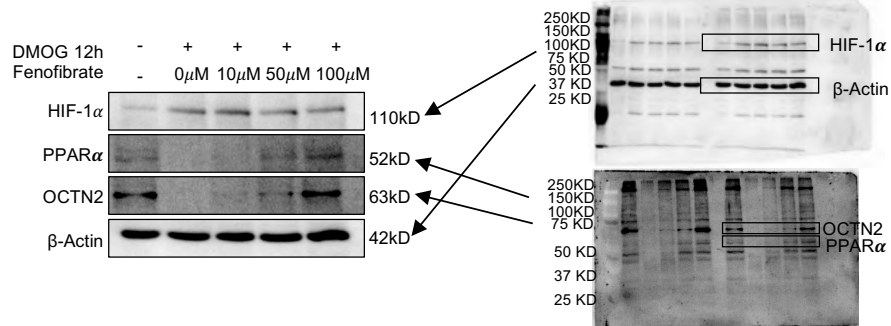

**Fig 7b**

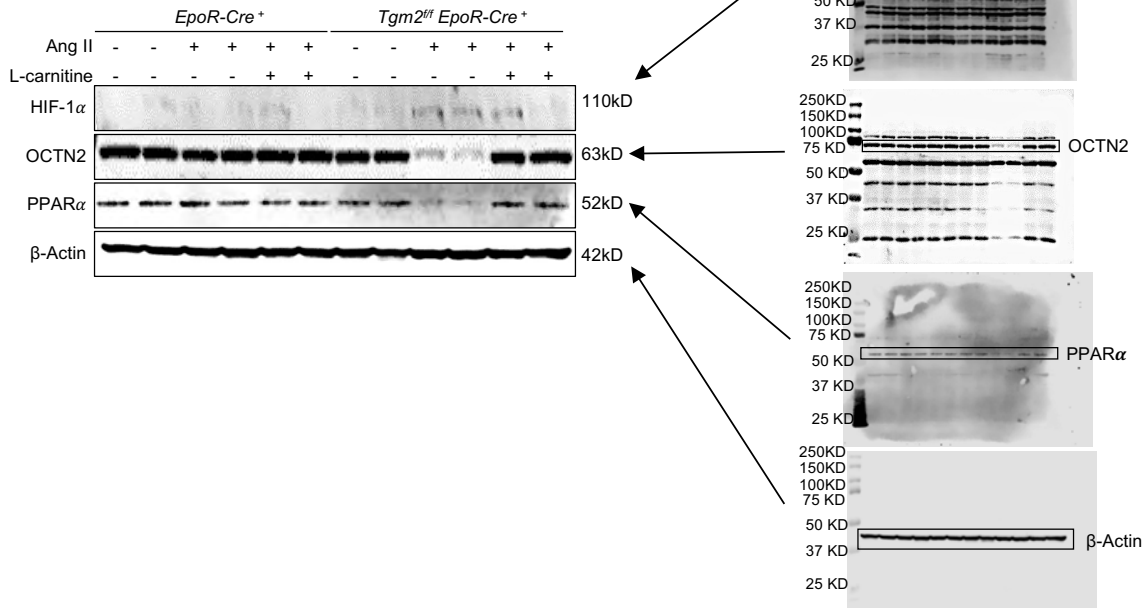

**Fig 7d**

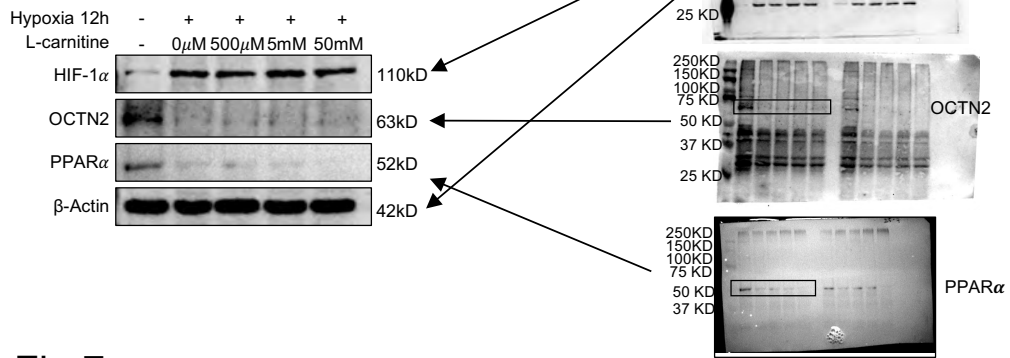

**Fig 7e**

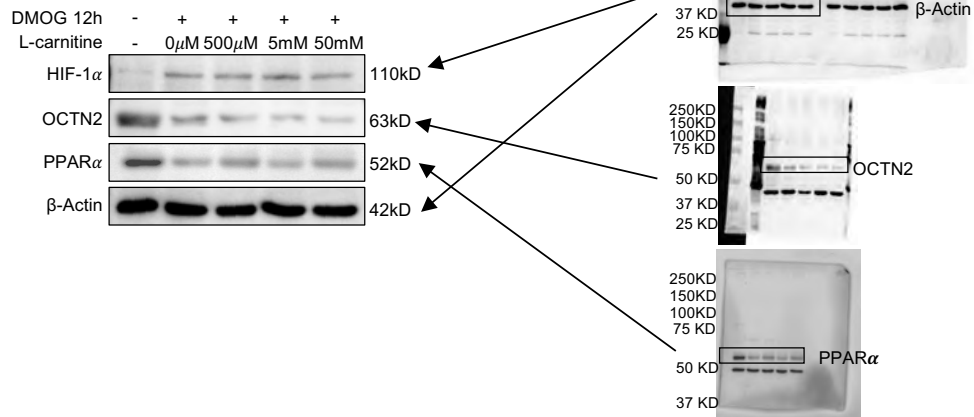

Fig S1a

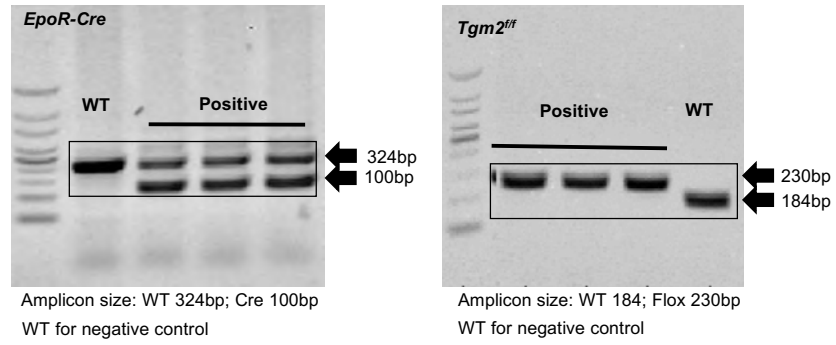

Fig S1b

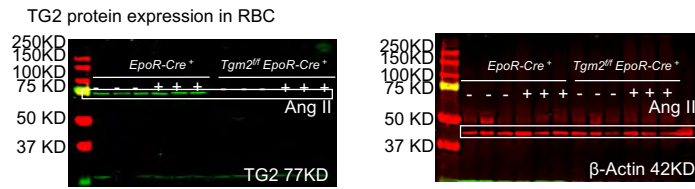

Fig S1c

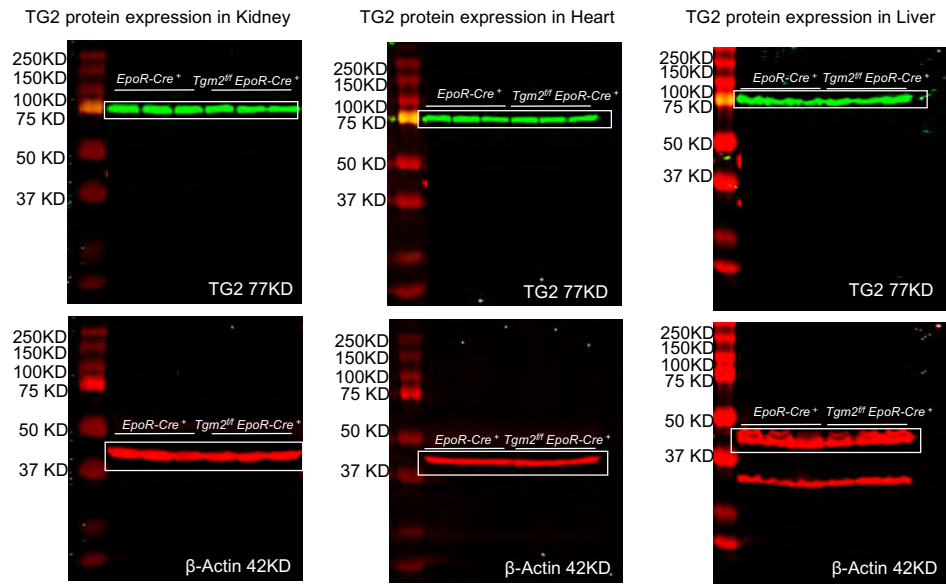

Supplement: NIHMS1774798-supplement-3.pdf [file NIHMS1774798-supplement-3.pdf]
